# Supplementary material for: In situ exfoliation and modification of graphite foil in supercapacitor devices: a facile strategy to fabricate high-performance supercapacitors
Source: Royal Society of Chemistry journal article supplement (doi:10.1039/d0ra10533c), 2021-01-01
Supplement: d0ra10533c1.pdf [file d0ra10533c1.pdf]

## Electronic Supporting Information

### In-Situ Exfoliation and Modification of Graphite Foil in Supercapacitor Devices: A Facile Strategy to Fabricate High-Performance Supercapacitors

Byungkwon Jang, Han Kim, Si-Woo Park, Minseob Lim, Jimin Lee, Gwang Myeong Go, and Yong-Ho Choa\*

*Department of Materials Science and Chemical Engineering, Hanyang University, Ansan, Korea*

#### Chemicals and Materials

Expandable graphite (+50 mesh sized), and manganese acetate tetrahydrate ( $\text{Mn}(\text{OAc})_2 \cdot 4\text{H}_2\text{O}$ , >99 %), and Potassium nitrate ( $\text{KNO}_3$ , >99.0 %) were purchased from Sigma Aldrich. Polyester single coated tape (silicone adhesive, 3M™ 8993K), and Cellulose separator (Quantitative filter paper, NO.50, 200  $\mu\text{m}$  thickness) was purchased from 3M and Hyundai Micro, respectively.

#### Fabrication of graphite foil

Expandable graphite (1.5 g) was thermally expanded in a box furnace with a temperature of 950 °C for 3 minutes. After expansion and colling to room temperature, the resulting expanded graphite was pre-formed in 3cm by 12 cm sized-mold and roll-pressed to fabricate graphite foil with a thickness of 100  $\mu\text{m}$ .

#### GF supercapacitor device fabrication

As-made graphite foil cut into the desired form to apply an electrode of supercapacitor without current collector using a blade. A cut graphite foil electrode was attached to the adhesive side of silicone tape, and 1 M  $\text{KNO}_3$  soaked cellulose paper was placed on it. After placing another electrode on them again, the supercapacitor device was assembled using silicone tape and rubbed with a rubber roller to make a highly packed device.

#### EGF//EGF supercapacitor device fabrication

To get out the gases produced in the assembled device, the silicone tape of the GF supercapacitor device was stripped off as a size of 2 mm x 2 mm during in-situ electrochemical exfoliation. Using a power supply, a voltage was sequentially applied to an electrode at 3.0 V for 30 minutes, 4.0 V for 10 minutes, finally, 5.0 V for 5 minutes in step, and the same voltage sequence was applied to another electrode. After the exfoliation step, the exhaust hole was closed using silicone tape.

#### EGF//MEGF supercapacitor device fabrication

The fabrication method of the EGF//MEGF supercapacitor device was same to the EGF//EGF supercapacitor fabrication method using 1 M  $\text{KNO}_3$  mixed with 10 mM  $\text{Mn}(\text{OAc})_2$  electrolyte instead of 1 M  $\text{KNO}_3$ .

As-made graphite foil cut into the desired form to apply an electrode of supercapacitor without current collector using a blade. A cut graphite foil electrode was attached to the adhesive side of silicone tape, and 1 M  $\text{KNO}_3$  mixed with 10mM  $\text{Mn}(\text{OAc})_2$  soaked cellulose paper was placed on it. After placing another electrode on them again, the supercapacitor device was assembled using silicone tape and rubbed with a rubber roller to make a highly packed device. To get out the gases produced in the assembled device, the silicone tape of the GF supercapacitor device was stripped off as a size of 2 mm x 2 mm during in-situ electrochemical exfoliation. Using

a power supply, a voltage was sequentially applied to an electrode at 3.0 V for 30 minutes, 4.0 V for 10 minutes, finally, 5.0 V for 5 minutes in step, and the same voltage sequence was applied to another electrode. After the exfoliation step, the exhaust hole was closed using silicone tape.

## Characterization

The surface morphology, and corresponding microstructures of the electrodes were analyzed by field emission scanning electron microscopy (FE-SEM, S-4800, Hitachi). Structural characterization of the electrodes was performed using an X-ray diffractometer (XRD, D/MAX-2500/PC, Rigaku) with Cu K $\alpha$  radiation (1.5406 Å). The surface chemical states were investigated by X-ray photoelectron spectroscopy (XPS, AXIS-Nova, Kratos) with an Al K $\alpha$  radiation source (1486.8 eV) in an ultrahigh vacuum chamber ( $7 \times 10^{-9}$  torr). Cyclic voltammetry (CV), galvanostatic charge-discharge (GCD), and electrochemical impedance spectroscopy (EIS) measurements were conducted employing an electrochemical workstation (ZIVE MP1, WonATech). The areal capacitances were then calculated using the following equations<sup>1</sup>:

$$C = \frac{1}{S \times \nu \times \Delta V} \int_{V_0}^{V_0 + \Delta V} I dV \quad (\text{from CV curves})$$

$$C = \frac{I \times \Delta t}{S \times \Delta V} \quad (\text{from GCD curves})$$

where  $C$  is the areal capacitance (F/cm<sup>2</sup>),  $I$  is the discharging current density (A),  $\nu$  is the scan rate (V/s),  $V$  is the voltage (V),  $\Delta V$  is the operating voltage window (V),  $\Delta t$  is the discharging time (s), and  $S$  is the active area of the electrodes (cm<sup>2</sup>). Also, the energy density and power density were calculated by the following relationship<sup>2</sup>:

$$E = \frac{C \times (\Delta V)^2}{2 \times 3,600 (s/h)}$$

$$P = \frac{3,600 (s/h) \times E}{\Delta t}$$

where  $E$  (Wh/cm<sup>2</sup>) is the energy density and  $P$  (W/cm<sup>2</sup>) is the power density, respectively.

## Reference

1. Jungchul Noh, Chang-Min Yoon, Yun Ki Kim, and Jyongsik Jang, *Carbon*, **2017**, 116, 470-478
2. Ling Miao, Hui Duan, Dazhang Zhu, Yaokang Lv, Lihua Gan, Liangchun Li, and Mingxian Liu, *J. Mater. Chem. A*, **2021**, Advance Article
